# Supplementary material for: A novel ion-responsive photonic hydrogel sensor for portable visual detection and timely removal of lead ions in water
Source: Royal Society of Chemistry journal article supplement (doi:10.1039/d2ma00232a), 2022-01-01
Supplement: d2ma00232a1.pdf [file d2ma00232a1.pdf]

## Electronic Supplementary Information

### **A ion-responsive photonic hydrogel sensor for portable visual detection and timely removal of lead ions in water**

Zhuo Peng<sup>a</sup>, HaiRong Yu<sup>\*a,b</sup>, JingYa Wen<sup>a</sup>, YinLin Wang<sup>a</sup>, Ting Liang<sup>a,b</sup> and Chang-Jing Cheng<sup>\*a,b</sup>

<sup>a</sup> College of Chemistry and Environment, Southwest Minzu University, Chengdu, Sichuan 610041, China. *Email:* yuhr@swun.edu.cn, chengcj@swun.edu.cn

<sup>b</sup> Key Laboratory of Pollution Control Chemistry and Environmental Functional Materials for Qinghai-Tibet Plateau of the National Ethnic Affairs Commission, College of Chemistry and Environment, Southwest Minzu University, Chengdu, Sichuan 610041, China

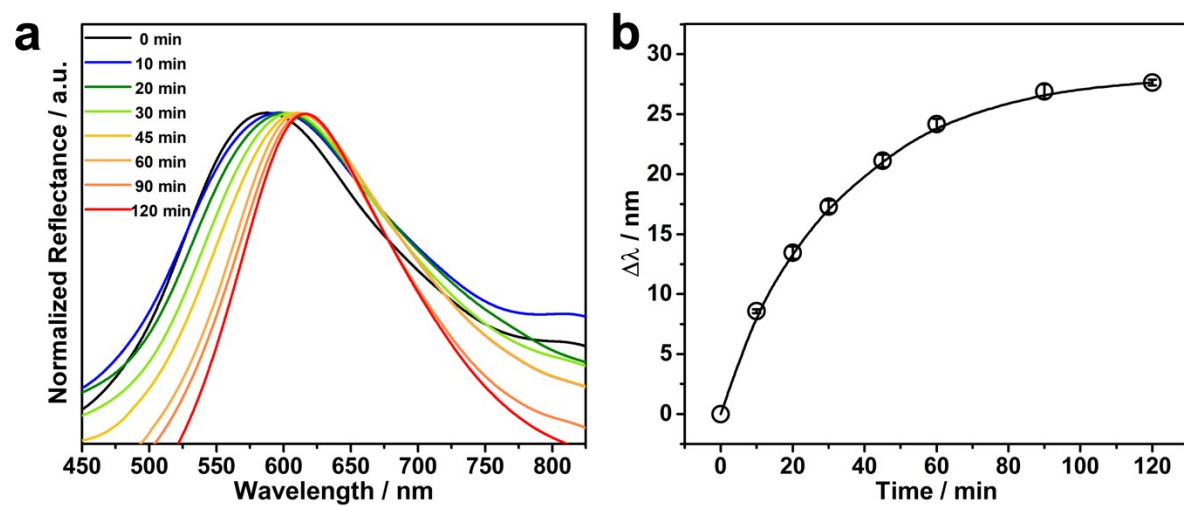

**Fig. S1** (a) Reflection spectra and (b)  $\Delta\lambda$  of the PNBC photonic hydrogel sensor in response to 1.0 mM  $\text{Pb}^{2+}$  solution for different time.

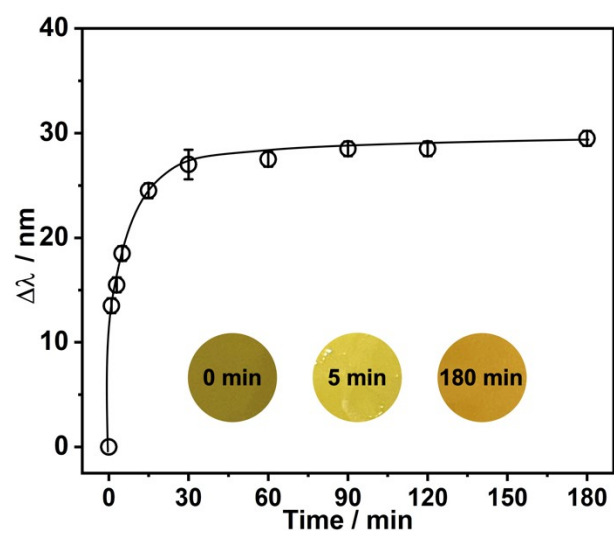

**Fig. S2** The  $\Delta\lambda$  of the 250  $\mu\text{m}$ -thick PNBC photonic hydrogel sensor in response to 5 mM  $\text{Pb}^{2+}$  solution for different time.

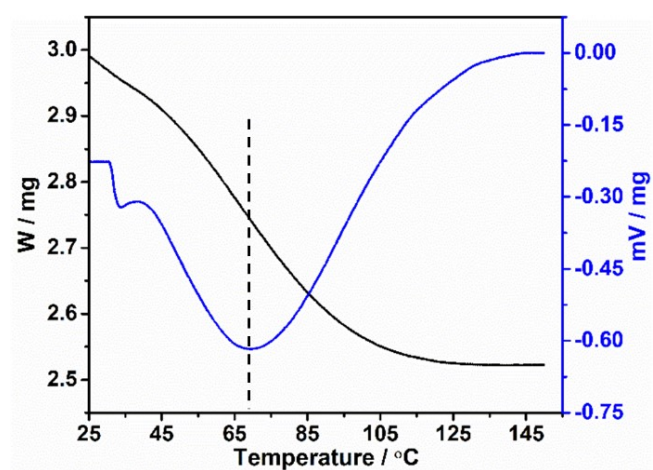

**Fig. S3** TG-DSC curves of the PNBC photonic hydrogel.

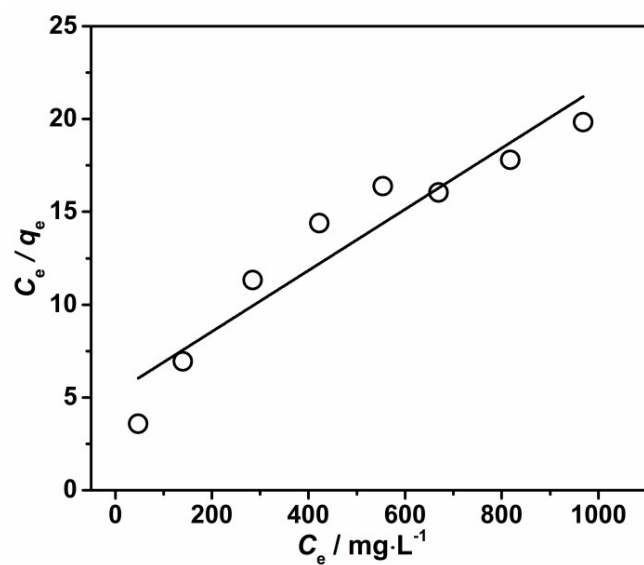

**Fig. S4** Fitting of the Langmuir isotherm model for  $\text{Pb}^{2+}$  adsorption onto the PNBC photonic hydrogel. The usage of the hydrogel is  $14 \text{ g} \cdot \text{L}^{-1}$ , the operating temperature is  $25 \text{ }^\circ\text{C}$ , and the pH value is 5.5.
